# Supplementary material
Source: PubMed Central journal article supplement (PMC6545859)
Supplement: 2018.209031_SILVA_SUPPL.pdf [file 2018.209031_SILVA_SUPPL.pdf]

**Convergence of risk prediction models in follicular lymphoma**

---

*Anjali Silva,<sup>1</sup> Sleiman Bassim,<sup>1</sup> Clémentine Sarkozy,<sup>2</sup> Anja Mottok,<sup>3</sup> Tracy Lackraj,<sup>4</sup> Vindi Jurinovic,<sup>4,5</sup> Marianne Brodtkorb,<sup>6</sup> Ole Christian Lingjaerde,<sup>6</sup> Laurie H. Sehn,<sup>2</sup> Randy D. Gascoyne,<sup>2</sup> Oliver Weigert,<sup>4</sup> Christian Steidl<sup>2</sup> and Robert Kridel<sup>1</sup>*

*<sup>1</sup>Princess Margaret Cancer Centre - University Health Network, Toronto, ON, Canada; <sup>2</sup>Centre for Lymphoid Cancer, BC Cancer Agency, Vancouver, BC, Canada; <sup>3</sup>Institute of Human Genetics, Ulm University and Ulm University Medical Center, Germany; <sup>4</sup>Department of Medicine III, University Hospital, Ludwig Maximilians University Munich, Germany; <sup>5</sup>Institute for Medical Information Processing, Biometry and Epidemiology, Ludwig Maximilians University Munich, Germany and <sup>6</sup>Centre for Cancer Biomedicine, Oslo University Hospital, Norway*

*Correspondence: ROBERT KRIDEL. robert.kridel@uhn.ca  
doi:10.3324/haematol.2018.209031*

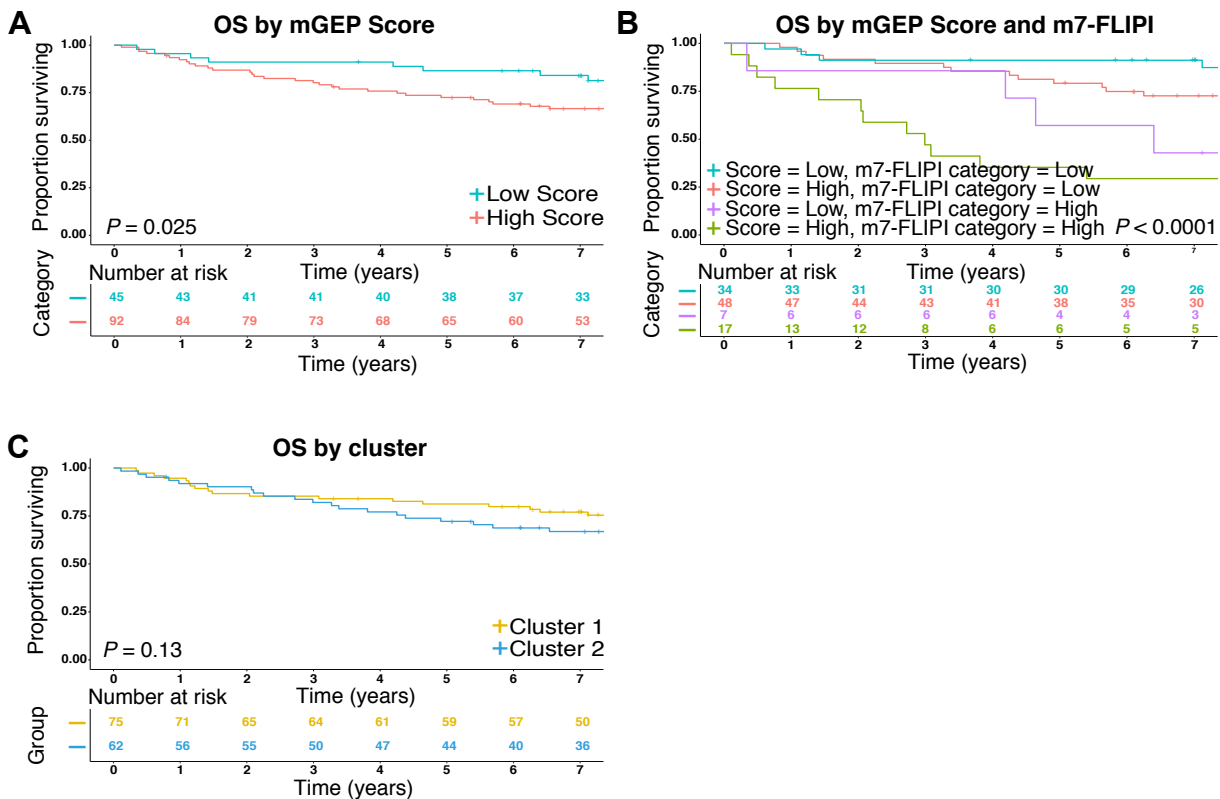

**Supplemental Figure 1. Overall survival (OS) by mGEP Score, clusters and both mGEP Score and m7-FLIPI.** (A) OS by mGEP Score in our cohort. Five-year OS was 72% vs. 87% in patients with high and low mGEP Score, respectively. (B) OS by mGEP Score and m7-FLIPI in our cohort. Five-year OS was 35% in patients with high mGEP Score and high risk m7-FLIPI. (C) OS by cluster in our cohort. Five-year OS was 72% vs. 81% in patients with Cluster 2 and Cluster 1, respectively.

**Supplemental Table 1:** Association of individual FLIPI factors with clusters.

|                                | N (%)     |           |           | P    |
|--------------------------------|-----------|-----------|-----------|------|
|                                | Evaluable | Cluster 1 | Cluster 2 |      |
| <b>Age ≤ 60</b>                | 137       | 32 (43%)  | 34 (55%)  | 0.21 |
| <b>Age &gt; 60</b>             |           | 43 (57%)  | 28 (45%)  |      |
| <b>Age continuous</b>          | 137       | 75 (100%) | 62 (100%) | 0.03 |
| <b>Hemoglobin ≥ 120g/l</b>     | 130       | 59 (83%)  | 45 (76%)  | 0.45 |
| <b>Hemoglobin &lt; 120g/l</b>  |           | 12 (17%)  | 14 (24%)  |      |
| <b>LDH normal</b>              | 130       | 59 (83%)  | 45 (76%)  | 0.45 |
| <b>LDH elevated</b>            |           | 12 (17%)  | 14 (24%)  |      |
| <b># of nodal sites ≤ 4</b>    | 135       | 17 (23%)  | 15 (25%)  | 0.99 |
| <b># of nodal sites &gt; 4</b> |           | 57 (77%)  | 46 (75%)  |      |
| <b># of nodal continuous</b>   | 135       | 74 (100%) | 61 (100%) | 0.96 |
| <b>Stage I, II</b>             | 137       | 8 (11%)   | 6 (10%)   | 1    |
| <b>Stage III, IV</b>           |           | 67 (89%)  | 56 (90%)  |      |

LDH, lactate dehydrogenase.
